# Supplementary material for: Lack of miR-379/miR-544 Cluster Resists High-Fat Diet-Induced Obesity and Prevents Hepatic Triglyceride Accumulation in Mice
Source: Front Cell Dev Biol. 2021 Aug 30;9:720900. doi: 10.3389/fcell.2021.720900 (PMC8435714; doi:10.3389/fcell.2021.720900)
Supplement: Supplementary file 9 [file Table_5.XLSX]

## Sheet: Table S4
Term	Database	ID	Input_number	Background_number	Rich_factor	P_Value	Corrected P_Value	Input	Hyperlink
Complement and coagulation cascades	KEGG PATHWAY	mmu04610	11	87	9.51	8.3898e-07	0.000145983	mmu:12262:C1qc|mmu:56373:Cpb2|mmu:99571:Gm30097|mmu:12759:Clu|mmu:20702:Serpina1c|mmu:20703:Serpina1d|mmu:12274:C6|mmu:21824:Thbd|mmu:20700:Gm8893|mmu:20700:Serpina1a|mmu:99571:Fgg	http://www.genome.jp/kegg-bin/show_pathway?mmu04610/mmu:99571%09red/mmu:12274%09red/mmu:12759%09red/mmu:20700%09red/mmu:20703%09red/mmu:20702%09red/mmu:56373%09red/mmu:21824%09red/mmu:12262%09red
Parkinson's disease	KEGG PATHWAY	mmu05012	12	149	6.06	1.9899e-05	0.00173121	mmu:228033:Atp5g3|mmu:11950:Atp5f1|mmu:12858:Cox5a|mmu:20463:Cox7a2l|mmu:72900:Ndufv2|mmu:22187:Gm1821|mmu:70316:Gm44986|mmu:11949:Atp5c1|mmu:13063:Gm10108|mmu:17993:Ndufs4|mmu:17992:Ndufa4|mmu:67942:Gm10175	http://www.genome.jp/kegg-bin/show_pathway?mmu05012/mmu:67942%09red/mmu:20463%09red/mmu:72900%09red/mmu:12858%09red/mmu:11949%09red/mmu:17993%09red/mmu:70316%09red/mmu:22187%09red/mmu:11950%09red/mmu:228033%09red/mmu:17992%09red/mmu:13063%09red
Oxidative phosphorylation	KEGG PATHWAY	mmu00190	11	139	5.95	5.09121e-05	0.0029529	mmu:228033:Atp5g3|mmu:11950:Atp5f1|mmu:12858:Cox5a|mmu:20463:Cox7a2l|mmu:72900:Ndufv2|mmu:67895:Ppa1|mmu:70316:Gm44986|mmu:11949:Atp5c1|mmu:17993:Ndufs4|mmu:17992:Ndufa4|mmu:67942:Gm10175	http://www.genome.jp/kegg-bin/show_pathway?mmu00190/mmu:67942%09red/mmu:72900%09red/mmu:12858%09red/mmu:11949%09red/mmu:228033%09red/mmu:70316%09red/mmu:11950%09red/mmu:20463%09red/mmu:17992%09red/mmu:17993%09red/mmu:67895%09red
Huntington's disease	KEGG PATHWAY	mmu05016	13	199	4.91	7.01621e-05	0.00305205	mmu:228033:Atp5g3|mmu:11950:Atp5f1|mmu:12858:Cox5a|mmu:20463:Cox7a2l|mmu:72900:Ndufv2|mmu:208647:Creb3l2|mmu:70316:Gm44986|mmu:11949:Atp5c1|mmu:13063:Gm10108|mmu:14775:Gpx1|mmu:17993:Ndufs4|mmu:17992:Ndufa4|mmu:67942:Gm10175	http://www.genome.jp/kegg-bin/show_pathway?mmu05016/mmu:67942%09red/mmu:20463%09red/mmu:72900%09red/mmu:12858%09red/mmu:11949%09red/mmu:17993%09red/mmu:70316%09red/mmu:208647%09red/mmu:11950%09red/mmu:228033%09red/mmu:17992%09red/mmu:13063%09red/mmu:14775%09red
Metabolic pathways	KEGG PATHWAY	mmu01100	41	1298	2.37	0.000187048	0.00650928	mmu:228033:Atp5g3|mmu:12858:Cox5a|mmu:18242:Oat|mmu:11949:Atp5c1|mmu:66422:Dctpp1|mmu:17993:Ndufs4|mmu:17992:Ndufa4|mmu:13124:Cyp8b1|mmu:192166:Sardh|mmu:26897:Acot1|mmu:52538:Acaa2|mmu:74147:Ehhadh|mmu:72900:Ndufv2|mmu:14121:Fbp1|mmu:13106:Cyp2e1|mmu:100559:Ugt2b38|mmu:11668:Aldh1a1|mmu:11532:Adh5|mmu:21991:RP24-63K13.5|mmu:69574:Cmbl|mmu:11950:Atp5f1|mmu:16828:Ldha|mmu:56451:Suclg1|mmu:12116:Gm…	http://www.genome.jp/kegg-bin/show_pathway?mmu01100/mmu:17992%09red/mmu:17449%09red/mmu:11532%09red/mmu:11668%09red/mmu:18979%09red/mmu:17993%09red/mmu:18700%09red/mmu:67942%09red/mmu:14245%09red/mmu:72900%09red/mmu:56451%09red/mmu:76238%09red/mmu:13106%09red/mmu:15490%09red/mmu:18113%09red/mmu:70316%09red/mmu:13063%09red/mmu:100705%09red/mmu:13124%09red/mmu:76974%09red/mmu:21991%09red/mmu:14121%…
Protein processing in endoplasmic reticulum	KEGG PATHWAY	mmu04141	11	167	4.95	0.000233454	0.00677017	mmu:67838:Dnajb11|mmu:81500:Sil1|mmu:14828:Hspa5|mmu:74126:Syvn1|mmu:22027:1810014B01Rik|mmu:71853:Pdia6|mmu:12017:Bag1|mmu:72265:Tram1|mmu:70377:Derl3|mmu:18453:P4hb|mmu:12282:Hyou1	http://www.genome.jp/kegg-bin/show_pathway?mmu04141/mmu:70377%09red/mmu:12282%09red/mmu:71853%09red/mmu:67838%09red/mmu:14828%09red/mmu:22027%09red/mmu:74126%09red/mmu:12017%09red/mmu:18453%09red/mmu:72265%09red/mmu:81500%09red
Ribosome	KEGG PATHWAY	mmu03010	10	148	5.08	0.000367897	0.00811341	mmu:66223:Mrpl35|mmu:66448:Mrpl20|mmu:20091:Rps3a1|mmu:102634941:Gm11955|mmu:319195:Rpl17-ps8|mmu:102634941:Gm10709|mmu:67891:Rpl4|mmu:94065:Mrpl34|mmu:68436:Gm14201|mmu:102634941:Gm13841	http://www.genome.jp/kegg-bin/show_pathway?mmu03010/mmu:20091%09red/mmu:68436%09red/mmu:94065%09red/mmu:102634941%09red/mmu:67891%09red/mmu:66223%09red/mmu:66448%09red/mmu:319195%09red
Alzheimer's disease	KEGG PATHWAY	mmu05010	11	177	4.67	0.000373031	0.00811341	mmu:228033:Atp5g3|mmu:11950:Atp5f1|mmu:12858:Cox5a|mmu:20463:Cox7a2l|mmu:72900:Ndufv2|mmu:70316:Gm44986|mmu:11949:Atp5c1|mmu:13063:Gm10108|mmu:17993:Ndufs4|mmu:17992:Ndufa4|mmu:67942:Gm10175	http://www.genome.jp/kegg-bin/show_pathway?mmu05010/mmu:67942%09red/mmu:20463%09red/mmu:72900%09red/mmu:12858%09red/mmu:11949%09red/mmu:17993%09red/mmu:70316%09red/mmu:11950%09red/mmu:228033%09red/mmu:17992%09red/mmu:13063%09red
Steroid hormone biosynthesis	KEGG PATHWAY	mmu00140	7	87	6.05	0.00107718	0.0203052	mmu:13101:Cyp2d10|mmu:71754:Cyp2d40|mmu:13106:Cyp2e1|mmu:100559:Ugt2b38|mmu:13123:Cyp7b1|mmu:78925:Srd5a1|mmu:15490:Hsd17b7	http://www.genome.jp/kegg-bin/show_pathway?mmu00140/mmu:13101%09red/mmu:13123%09red/mmu:13106%09red/mmu:78925%09red/mmu:100559%09red/mmu:71754%09red/mmu:15490%09red
Metabolism of xenobiotics by cytochrome P450	KEGG PATHWAY	mmu00980	6	65	6.94	0.00126668	0.0203052	mmu:14865:Gstm4|mmu:13106:Cyp2e1|mmu:14873:Gsto1|mmu:11522:Gm16559|mmu:100559:Ugt2b38|mmu:11532:Adh5	http://www.genome.jp/kegg-bin/show_pathway?mmu00980/mmu:13106%09red/mmu:14873%09red/mmu:100559%09red/mmu:14865%09red/mmu:11532%09red/mmu:11522%09red
Glycolysis / Gluconeogenesis	KEGG PATHWAY	mmu00010	6	66	6.84	0.00136248	0.0203052	mmu:16828:Ldha|mmu:18655:Pgk1|mmu:11522:Gm16559|mmu:14121:Fbp1|mmu:11532:Adh5|mmu:21991:RP24-63K13.5	http://www.genome.jp/kegg-bin/show_pathway?mmu00010/mmu:16828%09red/mmu:21991%09red/mmu:14121%09red/mmu:18655%09red/mmu:11532%09red/mmu:11522%09red
Drug metabolism - cytochrome P450	KEGG PATHWAY	mmu00982	6	67	6.73	0.00146372	0.0203052	mmu:14865:Gstm4|mmu:13106:Cyp2e1|mmu:14873:Gsto1|mmu:11522:Gm16559|mmu:100559:Ugt2b38|mmu:11532:Adh5	http://www.genome.jp/kegg-bin/show_pathway?mmu00982/mmu:13106%09red/mmu:14873%09red/mmu:100559%09red/mmu:14865%09red/mmu:11532%09red/mmu:11522%09red
Proteasome	KEGG PATHWAY	mmu03050	5	45	8.35	0.00151706	0.0203052	mmu:19167:Gm13835|mmu:19173:Psmb5|mmu:23997:Psmd13|mmu:26442:Psma5|mmu:19173:Mir686	http://www.genome.jp/kegg-bin/show_pathway?mmu03050/mmu:19173%09red/mmu:23997%09red/mmu:19167%09red/mmu:26442%09red
Propanoate metabolism	KEGG PATHWAY	mmu00640	4	31	9.7	0.00276704	0.0343903	mmu:16828:Ldha|mmu:56451:Suclg1|mmu:74147:Ehhadh|mmu:100705:Acacb	http://www.genome.jp/kegg-bin/show_pathway?mmu00640/mmu:100705%09red/mmu:56451%09red/mmu:16828%09red/mmu:74147%09red
Prion diseases	KEGG PATHWAY	mmu05020	4	34	8.85	0.00374909	0.0434894	mmu:14828:Hspa5|mmu:12262:C1qc|mmu:13653:Egr1|mmu:12274:C6	http://www.genome.jp/kegg-bin/show_pathway?mmu05020/mmu:13653%09red/mmu:14828%09red/mmu:12274%09red/mmu:12262%09red
Carbon metabolism	KEGG PATHWAY	mmu01200	7	118	4.46	0.0053879	0.0585934	mmu:18655:Pgk1|mmu:56451:Suclg1|mmu:14121:Fbp1|mmu:11532:Adh5|mmu:74147:Ehhadh|mmu:21991:RP24-63K13.5|mmu:17449:Mdh1	http://www.genome.jp/kegg-bin/show_pathway?mmu01200/mmu:17449%09red/mmu:21991%09red/mmu:14121%09red/mmu:56451%09red/mmu:18655%09red/mmu:74147%09red/mmu:11532%09red
Pyruvate metabolism	KEGG PATHWAY	mmu00620	4	39	7.71	0.00586782	0.0600588	mmu:16828:Ldha|mmu:100705:Acacb|mmu:76238:Grhpr|mmu:17449:Mdh1	http://www.genome.jp/kegg-bin/show_pathway?mmu00620/mmu:100705%09red/mmu:76238%09red/mmu:16828%09red/mmu:17449%09red
Chemical carcinogenesis	KEGG PATHWAY	mmu05204	6	93	4.85	0.0066905	0.0646749	mmu:14865:Gstm4|mmu:13106:Cyp2e1|mmu:14873:Gsto1|mmu:11522:Gm16559|mmu:100559:Ugt2b38|mmu:11532:Adh5	http://www.genome.jp/kegg-bin/show_pathway?mmu05204/mmu:13106%09red/mmu:14873%09red/mmu:100559%09red/mmu:14865%09red/mmu:11532%09red/mmu:11522%09red
Non-alcoholic fatty liver disease (NAFLD)	KEGG PATHWAY	mmu04932	8	157	3.83	0.0071178	0.0651841	mmu:70316:Gm44986|mmu:12858:Cox5a|mmu:20463:Cox7a2l|mmu:13106:Cyp2e1|mmu:72900:Ndufv2|mmu:13063:Gm10108|mmu:17993:Ndufs4|mmu:17992:Ndufa4	http://www.genome.jp/kegg-bin/show_pathway?mmu04932/mmu:13106%09red/mmu:72900%09red/mmu:12858%09red/mmu:13063%09red/mmu:70316%09red/mmu:20463%09red/mmu:17992%09red/mmu:17993%09red
Glucagon signaling pathway	KEGG PATHWAY	mmu04922	6	102	4.42	0.0100786	0.0876838	mmu:16828:Ldha|mmu:14121:Fbp1|mmu:18682:Phkg1|mmu:208647:Creb3l2|mmu:18639:Pfkfb1|mmu:100705:Acacb	http://www.genome.jp/kegg-bin/show_pathway?mmu04922/mmu:100705%09red/mmu:16828%09red/mmu:14121%09red/mmu:18639%09red/mmu:208647%09red/mmu:18682%09red
Fatty acid degradation	KEGG PATHWAY	mmu00071	4	49	6.14	0.0122094	0.101163	mmu:11532:Adh5|mmu:74147:Ehhadh|mmu:11522:Gm16559|mmu:52538:Acaa2	http://www.genome.jp/kegg-bin/show_pathway?mmu00071/mmu:11532%09red/mmu:74147%09red/mmu:52538%09red/mmu:11522%09red
Peroxisome	KEGG PATHWAY	mmu04146	5	83	4.53	0.0167058	0.132128	mmu:234384:Mpv17l2|mmu:67993:Nudt12os|mmu:19301:Pxmp2|mmu:54683:Prdx5|mmu:74147:Ehhadh	http://www.genome.jp/kegg-bin/show_pathway?mmu04146/mmu:19301%09red/mmu:74147%09red/mmu:234384%09red/mmu:54683%09red/mmu:67993%09red
PPAR signaling pathway	KEGG PATHWAY	mmu03320	5	85	4.42	0.0182419	0.138004	mmu:11520:Plin2|mmu:13124:Cyp8b1|mmu:74147:Ehhadh|mmu:22190:Ubb|mmu:13167:Dbi	http://www.genome.jp/kegg-bin/show_pathway?mmu03320/mmu:11520%09red/mmu:22190%09red/mmu:13124%09red/mmu:13167%09red/mmu:74147%09red
Sulfur metabolism	KEGG PATHWAY	mmu00920	2	11	13.67	0.0195859	0.141998	mmu:13063:Gm10108|mmu:211389:Suox	http://www.genome.jp/kegg-bin/show_pathway?mmu00920/mmu:211389%09red/mmu:13063%09red
Retinol metabolism	KEGG PATHWAY	mmu00830	5	89	4.22	0.0215869	0.150245	mmu:67442:Gm45053|mmu:11532:Adh5|mmu:100559:Ugt2b38|mmu:11522:Gm16559|mmu:11668:Aldh1a1	http://www.genome.jp/kegg-bin/show_pathway?mmu00830/mmu:11532%09red/mmu:11668%09red/mmu:11522%09red/mmu:67442%09red/mmu:100559%09red
Fructose and mannose metabolism	KEGG PATHWAY	mmu00051	3	35	6.44	0.0260105	0.174071	mmu:18639:Pfkfb1|mmu:21991:RP24-63K13.5|mmu:14121:Fbp1	http://www.genome.jp/kegg-bin/show_pathway?mmu00051/mmu:18639%09red/mmu:21991%09red/mmu:14121%09red
Primary bile acid biosynthesis	KEGG PATHWAY	mmu00120	2	16	9.4	0.0363526	0.228446	mmu:13124:Cyp8b1|mmu:13123:Cyp7b1	http://www.genome.jp/kegg-bin/show_pathway?mmu00120/mmu:13124%09red/mmu:13123%09red
Glycine, serine and threonine metabolism	KEGG PATHWAY	mmu00260	3	41	5.5	0.0379439	0.228446	mmu:192166:Sardh|mmu:12116:Gm5096|mmu:76238:Grhpr	http://www.genome.jp/kegg-bin/show_pathway?mmu00260/mmu:76238%09red/mmu:12116%09red/mmu:192166%09red
Thyroid hormone synthesis	KEGG PATHWAY	mmu04918	4	71	4.24	0.0380744	0.228446	mmu:14828:Hspa5|mmu:22027:1810014B01Rik|mmu:14775:Gpx1|mmu:208647:Creb3l2	http://www.genome.jp/kegg-bin/show_pathway?mmu04918/mmu:14828%09red/mmu:14775%09red/mmu:208647%09red/mmu:22027%09red
